# Supplementary material
Source: publisher figshare collection journal article supplement (https://acs.figshare.com/ndownloader/files/3895639)
Supplement: Supplementary file 1 [file 3895639]

## SUPPORTING INFORMATION

### Binding of a Monoclonal Antibody to the Phospholamban Cytoplasmic Domain Interferes with the Channel Activity of Phospholamban Reconstituted in a Tethered Bilayer Lipid Membrane

*Serena Smeazzetto,<sup>†</sup> Alessio Sacconi,<sup>†</sup> Adrian L. Schwan,<sup>‡</sup> Giancarlo Margheri,<sup>§</sup> Francesco Tadini-  
Buoninsegni<sup>\*†</sup>*

<sup>†</sup>Department of Chemistry “Ugo Schiff”, University of Florence, 50019 Sesto Fiorentino, Italy

<sup>‡</sup>Department of Chemistry, University of Guelph, Guelph, ON Canada, N1G 2W1

<sup>§</sup>Institute for Complex Systems, National Research Council, 50019 Sesto Fiorentino, Italy

<sup>\*</sup>Francesco Tadini-Buoninsegni, Department of Chemistry “Ugo Schiff”, University of Florence,  
via della Lastruccia 3, 50019 Sesto Fiorentino, Italy,

Phone: +39-055-4573239; Fax: +39-055-4573142; E-mail: francesco.tadini@unifi.it

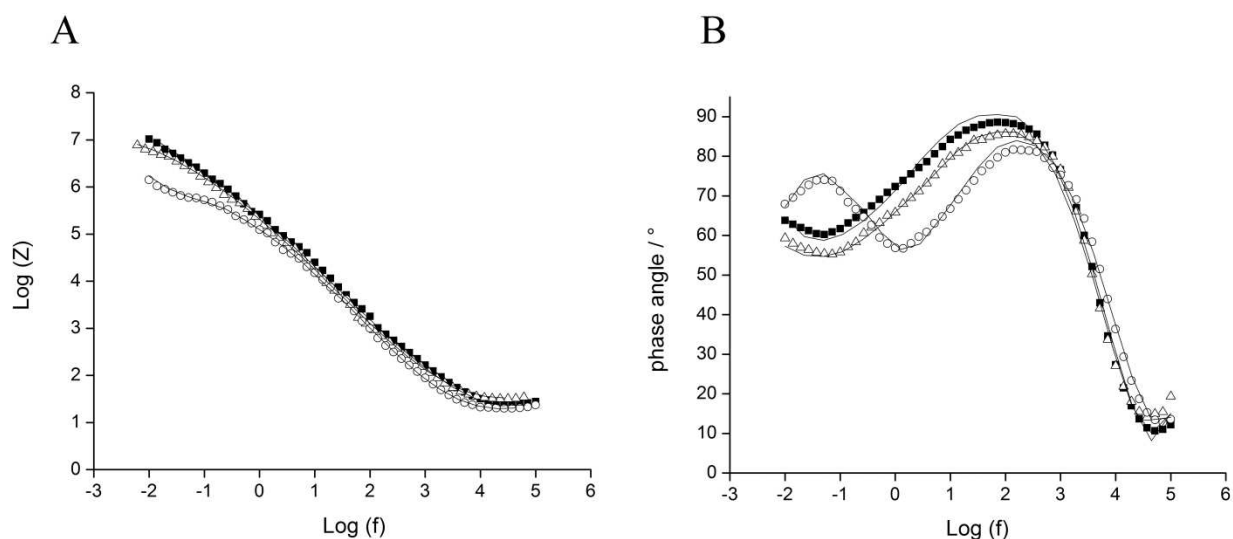

**Figure S1.** Impedance spectra were obtained by plotting  $\log(Z)$  (logarithm of impedance) versus  $\log(f)$  (logarithm of frequency) (A), and phase angle versus  $\log(f)$  (B) for a tBLM containing no PLN (filled squares), and following PLN reconstitution in the absence (empty circles) or presence of AbPLN (empty triangles) at an applied electrode potentials of -0.1 V (versus Ag/AgCl/0.1M KCl). The solid lines represent fitting curves of the EIS spectra by the equivalent circuit model shown in Fig. 1 (main text). The model parameters are reported in Table S1.

|                                      | CPE<br>( $\mu\text{F}\cdot\text{cm}^{-2}\text{s}^{(\alpha-1)}$ ) | $\alpha$        | CPE <sub>pores</sub><br>( $\mu\text{F}\cdot\text{cm}^{-2}\text{s}^{(\alpha_{\text{pores}}-1)}$ ) | $\alpha_{\text{pores}}$ | R <sub>pores</sub><br>( $\text{k}\Omega\cdot\text{cm}^2$ ) |
|--------------------------------------|------------------------------------------------------------------|-----------------|--------------------------------------------------------------------------------------------------|-------------------------|------------------------------------------------------------|
| tBLM                                 | $0.63 \pm 0.05$                                                  | $0.98 \pm 0.02$ | $0.93 \pm 0.1$                                                                                   | $0.54 \pm 0.02$         | $193 \pm 15$                                               |
| tBLM + PLN<br>(overnight incubation) | $0.67 \pm 0.05$                                                  | $0.99 \pm 0.02$ | $4.12 \pm 0.5$                                                                                   | $0.70 \pm 0.02$         | $28 \pm 5$                                                 |
| tBLM + PLN + AbPLN                   | $0.66 \pm 0.05$                                                  | $0.98 \pm 0.02$ | $2.37 \pm 0.05$                                                                                  | $0.73 \pm 0.02$         | $201 \pm 10$                                               |

**Table S1.** Model parameters obtained by fitting the equivalent circuit shown in Fig. 1 (main text) to the EIS spectra of Fig. S1 (A and B). The error gives the deviation from the fit.

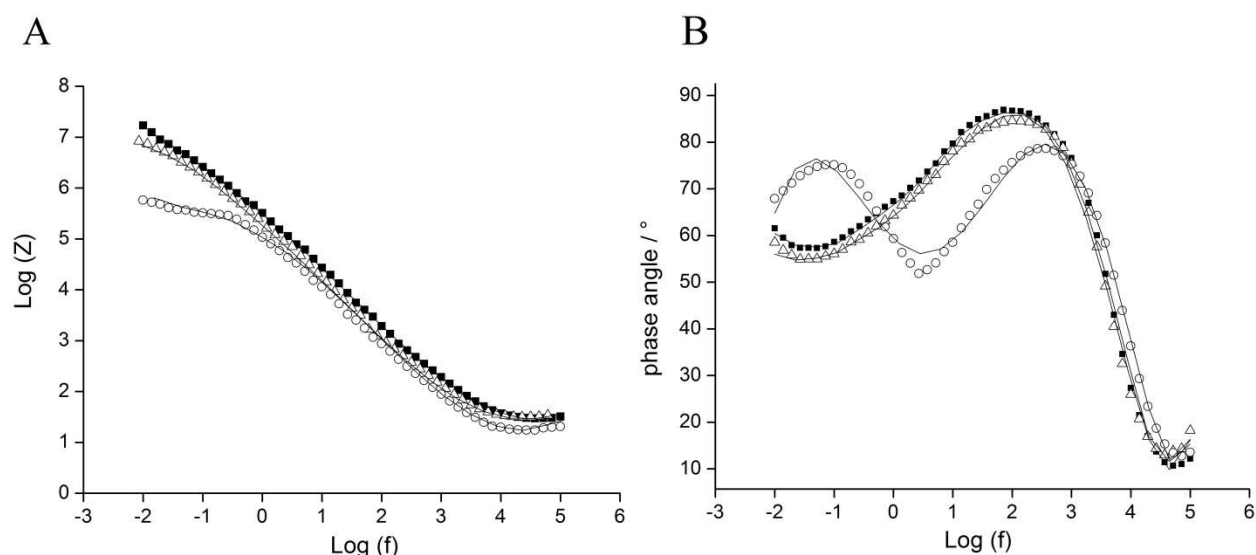

**Figure S2.** Impedance spectra were obtained by plotting  $\log(Z)$  (logarithm of impedance) versus  $\log(f)$  (logarithm of frequency) (A), and phase angle versus  $\log(f)$  (B) for a tBLM containing no PLN (filled squares), and following PLN reconstitution in the absence (empty circles) or presence of AbPLN (empty triangles) at an applied electrode potentials of 0.0 V (versus Ag/AgCl/0.1M KCl). The solid lines represent fitting curves of the EIS spectra by the equivalent circuit model shown in Fig. 1 (main text). The model parameters are reported in Table S2.

|                                      | CPE<br>( $\mu\text{F}\cdot\text{cm}^{-2}\text{s}^{(\alpha-1)}$ ) | $\alpha$        | CPE <sub>pores</sub><br>( $\mu\text{F}\cdot\text{cm}^{-2}\text{s}^{(\alpha_{\text{pores}}-1)}$ ) | $\alpha_{\text{pores}}$ | R <sub>pores</sub><br>( $\text{k}\Omega\cdot\text{cm}^2$ ) |
|--------------------------------------|------------------------------------------------------------------|-----------------|--------------------------------------------------------------------------------------------------|-------------------------|------------------------------------------------------------|
| tBLM                                 | $0.61 \pm 0.05$                                                  | $0.98 \pm 0.02$ | $0.93 \pm 0.1$                                                                                   | $0.51 \pm 0.02$         | $204 \pm 15$                                               |
| tBLM + PLN<br>(overnight incubation) | $0.63 \pm 0.05$                                                  | $0.99 \pm 0.02$ | $3.82 \pm 0.5$                                                                                   | $0.75 \pm 0.02$         | $35 \pm 5$                                                 |
| tBLM + PLN + AbPLN                   | $0.65 \pm 0.05$                                                  | $0.98 \pm 0.02$ | $1.94 \pm 0.05$                                                                                  | $0.63 \pm 0.02$         | $187 \pm 10$                                               |

**Table S2.** Model parameters obtained by fitting the equivalent circuit shown in Fig. 1 (main text) to the EIS spectra of Fig. S2 (A and B). The error gives the deviation from the fit.

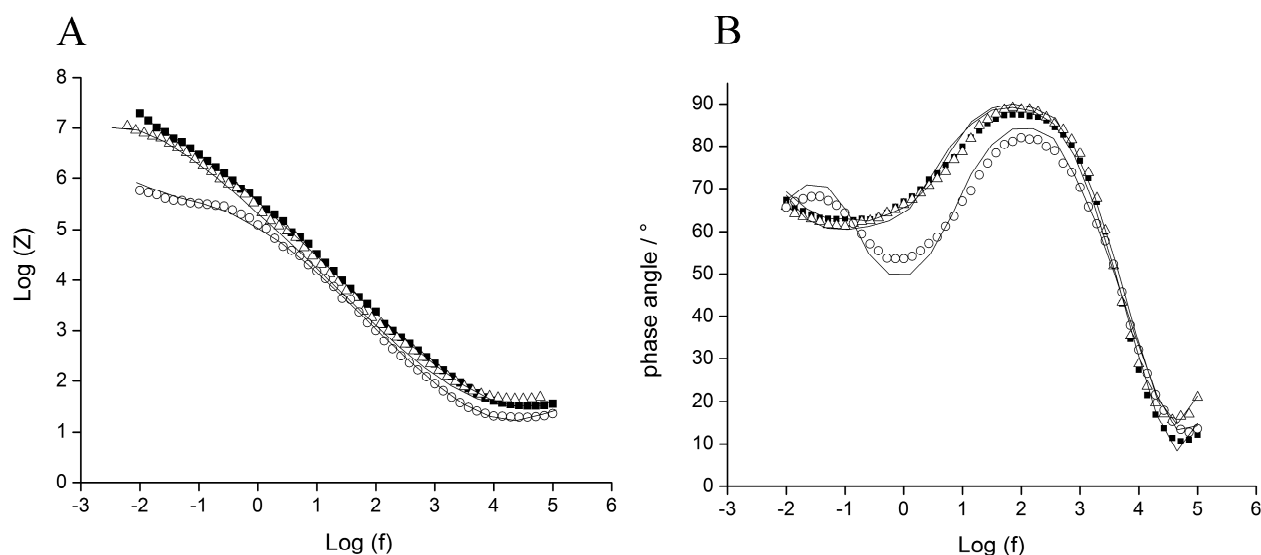

**Figure S3.** Impedance spectra were obtained by plotting  $\log(Z)$  (logarithm of impedance) versus  $\log(f)$  (logarithm of frequency) (A), and phase angle versus  $\log(f)$  (B) for a tBLM containing no PLN (filled squares), and following PLN reconstitution in the absence (empty circles) or presence of AbPLN (empty triangles) at an applied electrode potentials of 0.1 V (versus Ag/AgCl/0.1M KCl). The solid lines represent fitting curves of the EIS spectra by the equivalent circuit model shown in Fig. 1 (main text). The model parameters are reported in Table S3.

|                                      | CPE<br>( $\mu\text{F}\cdot\text{cm}^{-2}\text{s}^{(\alpha-1)}$ ) | $\alpha$        | CPE <sub>pores</sub><br>( $\mu\text{F}\cdot\text{cm}^{-2}\text{s}^{(\alpha_{\text{pores}}-1)}$ ) | $\alpha_{\text{pores}}$ | R <sub>pores</sub><br>( $\text{k}\Omega\cdot\text{cm}^2$ ) |
|--------------------------------------|------------------------------------------------------------------|-----------------|--------------------------------------------------------------------------------------------------|-------------------------|------------------------------------------------------------|
| tBLM                                 | $0.63 \pm 0.05$                                                  | $0.99 \pm 0.02$ | $0.96 \pm 0.1$                                                                                   | $0.52 \pm 0.02$         | $208 \pm 15$                                               |
| tBLM + PLN<br>(overnight incubation) | $0.63 \pm 0.05$                                                  | $0.99 \pm 0.02$ | $4.22 \pm 0.5$                                                                                   | $0.77 \pm 0.02$         | $42 \pm 5$                                                 |
| tBLM + PLN + AbPLN                   | $0.67 \pm 0.05$                                                  | $0.98 \pm 0.02$ | $1.64 \pm 0.05$                                                                                  | $0.65 \pm 0.02$         | $191 \pm 15$                                               |

**Table S3.** Model parameters obtained by fitting the equivalent circuit shown in Fig. 1 (main text) to the EIS spectra of Fig. S3 (A and B). The error gives the deviation from the fit.
